# Supplementary material for: Factors Associated With Manufacturer Drug Coupon Use at US Pharmacies
Source: PubMed Central journal article supplement (PMC8796883; doi:10.1001/jamahealthforum.2021.2123), 2021-08-13
Supplement: jamahealthforum-e212123-s001.pdf [file jamahealthforum-e212123-s001.pdf]

## Supplemental Online Content

Kang S-Y, Sen AP, Levy JF, Long J, Alexander GC, Anderson GF. Factors associated with manufacturer drug coupon use at US pharmacies. *JAMA Health Forum*. 2021;2(8):e212123. doi:10.1001/jamahealthforum.2021.2123

**eTable 1.** Adjusted likelihood of manufacturers' coupon use, drugs in the monopolistic market vs. market with high competition

**eTable 2.** Subgroup analysis – drugs with vs. without new in-class brand-name competitor

**eTable 3.** Estimated net total cost per patient and net-to-gross price ratio of prescription drugs by manufacturer coupon use

**eTable 4.** Adjusted Likelihood of Coupon Use Among Drugs With Coupon Use From Multilevel Mixed-Effect Logistic Regression With Net-Price-Based Cost Variable

**eTable 5.** Adjusted likelihood of manufacturers' coupon use for models with different specification of cost-related variables (n=2501)

**eTable 6.** Mean percentage point changes in the median of the proportion of transactions with coupons, quantile regression (n=2501)

**eTable 7.** Drug classes with high frequency of coupon use

This supplemental material has been provided by the authors to give readers additional information about their work.

**eTable 1. Adjusted likelihood of manufacturers' coupon use, drugs in the monopolistic market vs. market with high competition**

| Variables                                                                           | Drugs in the monopolistic market<br>(n=342) |         |               | Drugs in the market with high<br>competition (n=2,159) |         |           |
|-------------------------------------------------------------------------------------|---------------------------------------------|---------|---------------|--------------------------------------------------------|---------|-----------|
|                                                                                     | Odds Ratio                                  | p-value | 95%<br>CI     | Odds Ratio                                             | p-value | 95% CI    |
| <i>Patient-Cost Characteristics</i>                                                 |                                             |         |               |                                                        |         |           |
| Mean total cost per patient per drug (per 10% increase)                             | 1.06                                        | 0.00    | 1.02-<br>1.11 | 1.03                                                   | 0.000   | 1.01-1.04 |
| Mean patient copay before offset (per 10% increase)                                 | 0.92                                        | 0.01    | 0.87-<br>0.97 | 0.98                                                   | 0.003   | 0.97-0.99 |
| <i>Drug Characteristics</i>                                                         |                                             |         |               |                                                        |         |           |
| Later-class-entrant single-source drugs                                             |                                             |         |               | 1.44                                                   | 0.010   | 1.09-1.90 |
| <i>Drug-class Characteristics</i>                                                   |                                             |         |               |                                                        |         |           |
| Mean prevalence of coupon use among in-class competitors (5 percent point increase) |                                             |         |               | 1.18                                                   | 0.000   | 1.10-1.26 |
| Drug classes without generic competition                                            |                                             |         |               | 1.37                                                   | 0.163   | 0.88-2.14 |
| In-class mean total cost per patient per drug (per 10% increase)                    |                                             |         |               | 1.01                                                   | 0.075   | 0.99-1.03 |
| In-class mean patient copay before offset (per 10% increase)                        |                                             |         |               | 0.97                                                   | 0.054   | 0.94-1.00 |

Source: Author's analysis of data for October 2017- September 2019 from IQVIA Formulary Impact Analyzer.

**eTable 2. Subgroup analysis – drugs with vs. without new in-class brand-name competitor**

| Variables (referent)                                                                | Drugs with new brand-name competitor |         |            | Drugs without new brand-name competitor |         |           |
|-------------------------------------------------------------------------------------|--------------------------------------|---------|------------|-----------------------------------------|---------|-----------|
|                                                                                     | Odds Ratio                           | p-value | 95% CI     | Odds Ratio                              | p-value | 95% CI    |
| <i>Patient-Cost Characteristics</i>                                                 |                                      |         |            |                                         |         |           |
| Mean total cost per patient per drug <sup>a</sup> (per 100% increase)               | 1.46                                 | 0.002   | 1.16-1.84  | 1.24                                    | 0.003   | 1.08-1.43 |
| Mean patient copay before offset <sup>b</sup> (per 100% increase)                   | 0.83                                 | 0.095   | 0.66-1.03  | 0.79                                    | 0.010   | 0.66-0.95 |
| <i>Drug Characteristics</i>                                                         |                                      |         |            |                                         |         |           |
| Later-class-entrant single-source drugs                                             | 2.63                                 | 0.000   | 1.65-4.20  | 1.03                                    | 0.867   | 0.73-1.46 |
| <i>Drug-class Characteristics</i>                                                   |                                      |         |            |                                         |         |           |
| Mean prevalence of coupon use among in-class competitors (5 percent point increase) | 1.13                                 | 0.011   | 1.03-1.23  | 1.19                                    | 0.000   | 1.10-1.29 |
| Drug classes without generic competition                                            | 7.06                                 | 0.011   | 1.57-31.74 | 1.34                                    | 0.238   | 0.83-2.18 |
| In-class mean total cost per patient per drug (per 100% increase)                   | 1.18                                 | 0.169   | 0.98-1.49  | 1.08                                    | 0.375   | 0.91-1.27 |
| In-class mean patient copay before offset (per 100% increase)                       | 0.86                                 | 0.611   | 0.48-1.53  | 0.74                                    | 0.088   | 0.53-1.05 |
| Mean percentage of claims with coupons per drug, % (SD)                             | 10.2% (18.3%)                        |         |            | 5.9% (13.9%)                            |         |           |

Among drugs with estimated net-price information, 559 drugs (or 75%) had coupon use, and drugs with coupons had a lower mean net-to-gross ratios (63.4 vs. 71.1, eTable 3).

**eTable 3. Estimated net total cost per patient and net-to-gross price ratio of prescription drugs by manufacturer coupon use**

| Variables                                                                                     | All<br>(n=749)   | None<br>(n=190)  | Any<br>(n=559)     | t-test<br><i>p</i> -value | Group by Manufacturer Coupon Use<br>Frequency |                                        |                                         |                                        |
|-----------------------------------------------------------------------------------------------|------------------|------------------|--------------------|---------------------------|-----------------------------------------------|----------------------------------------|-----------------------------------------|----------------------------------------|
|                                                                                               |                  |                  |                    |                           | 1 <sup>st</sup><br>quartile<br>(n=106)        | 2 <sup>nd</sup><br>quartile<br>(n=134) | 3 <sup>rd</sup><br>quartile<br>(n= 159) | 4 <sup>th</sup><br>quartile<br>(n=160) |
| Estimated mean total net-cost per patient per drug, mean \$ (SD)                              | 16097<br>(43359) | 16193<br>(43542) | 16065.4<br>(43336) | 0.9722                    | 4570<br>(13253)                               | 10177<br>(20839)                       | 18181<br>(49799)                        | 26509<br>(58444)                       |
| Estimated mean net-to-gross price ratio per drug, % (SD)                                      | 65.5<br>(26.2)   | 71.1<br>(27.4)   | 63.4<br>(25.5)     | 0.0002                    | 63.2<br>(25.3)                                | 62.3<br>(25.7)                         | 65.2<br>(24.8)                          | 62.6<br>(26.1)                         |
| Relative net price-based total cost per patient per drug to the class mean, (SD) <sup>a</sup> | 1.00<br>(1.39)   | 0.89<br>(1.32)   | 1.04<br>(1.42)     | 0.2262                    | 0.75<br>(0.77)                                | 0.83<br>(0.59)                         | 1.19<br>(1.65)                          | 1.24<br>(1.87)                         |

In the sensitivity analyses using net-price based cost estimates, we found a stronger association between the within-class net-price based cost variable and likelihood of coupon use but coefficients for other drug-class level variables were not statistically significant possibly due to the small number of drug classes (**eTable 4**).

**eTable 4. Adjusted likelihood of coupon use among drugs with coupon use from multilevel mixed-effect logistic regression with net-price-based cost variable**

| Variables (referent)                                                                | Main model |         |           | Net price  |         |           | Net-to-WAC ratio |         |           |
|-------------------------------------------------------------------------------------|------------|---------|-----------|------------|---------|-----------|------------------|---------|-----------|
|                                                                                     | Odds Ratio | p-value | 95% CI    | Odds Ratio | p-value | 95% CI    | Odds Ratio       | p-value | 95% CI    |
| <i>Patient-Cost Characteristics</i>                                                 |            |         |           |            |         |           |                  |         |           |
| Mean total cost per patient per drug <sup>a</sup> (per 10% increase)                | 1.03       | 0.00    | 1.01-1.04 | 1.05       | 0.00    | 1.02-1.09 |                  |         |           |
| Mean patient copay before offset <sup>b</sup> (per 10% increase)                    | 0.98       | 0.00    | 0.97-0.99 | 0.94       | 0.00    | 0.91-0.98 | 0.96             | 0.005   | 0.93-0.99 |
| Mean net-price based total cost per patient per drug (per 100% increase)            |            |         |           |            |         |           |                  |         |           |
| Net-to-WAC ratio per drug (per 1% increase)                                         |            |         |           |            |         |           | 0.80             | 0.769   | 0.17-3.66 |
| <i>Drug Characteristics</i>                                                         |            |         |           |            |         |           |                  |         |           |
| Single-source later-class-entrant                                                   | 1.44       | 0.01    | 1.09-1.89 | 1.45       | 0.17    | 0.85-2.48 | 1.78             | 0.03    | 1.07-2.99 |
| <i>Drug-class Characteristics</i>                                                   |            |         |           |            |         |           |                  |         |           |
| Mean prevalence of coupon use among in-class competitors (5 percent point increase) | 1.18       | 0.00    | 1.10-1.26 | 1.12       | 0.05    | 1.00-1.25 | 1.13             | 0.031   | 1.01-1.26 |
| Drug classes without generic competition                                            | 1.35       | 0.18    | 0.87-2.09 | 1.64       | 0.20    | 0.77-3.47 | 1.41             | 0.31    | 0.73-2.74 |
| In-class mean total cost per patient per drug (per 10% increase)                    | 1.01       | 0.07    | 1.00-1.02 |            |         |           |                  |         |           |
| In-class mean patient copay before offset (per 10% increase)                        | 0.97       | 0.06    | 0.94-1.00 | 0.98       | 0.23    | 0.94-1.02 | 0.97             | 0.050   | 0.94-1.00 |
| In-class mean net-price-based total cost per patient per drug (per 1% increase)     |            |         |           | 0.99       | 0.95    | 0.98-1.02 |                  |         |           |
| In-class mean net-to-WAC ratio (per 1% increase)                                    |            |         |           |            |         |           | 0.74             | 0.67    | 0.19-2.92 |

Source: Author's analysis of data for October 2017- September 2019 from IQVIA Formulary Impact Analyzer and SSR Health Net Pricing Data

Using different combinations of cost copay-related variables and specifications, we found that our estimates for explanatory variables were consistent across models (**eTable 5**). For example, the odds ratio for later-class-entrant drugs was 1.42 ( $p=0.003$ ) in the model without cost variables and 1.44 ( $p=0.01$ ) in the main model.

**eTable 5. Adjusted likelihood of manufacturers' coupon use for models with different specification of cost-related variables (n=2501)**

| Variables                                                                           | Model 1 | Model 2 | Model 3 | Main model |
|-------------------------------------------------------------------------------------|---------|---------|---------|------------|
| <i>Patient-Cost Characteristics</i>                                                 |         |         |         |            |
| Mean total cost per patient per drug (per 10% increase)                             | -       | 1.03*** | -       | 1.03***    |
| Mean patient copay before offset (per 10% increase)                                 |         |         | 0.99    | 0.98**     |
| <i>Drug Characteristics</i>                                                         |         |         |         |            |
| Single-source later-class-entrant                                                   | 1.42**  | 1.43**  | 1.56**  | 1.44**     |
| <i>Drug-class Characteristics</i>                                                   |         |         |         |            |
| Mean prevalence of coupon use among in-class competitors (5 percent point increase) | 1.15*** | 1.17*** | 1.20*** | 1.18**     |
| Drug classes without generic competition                                            | 1.40    | 1.43    | 1.43    | 1.35       |
| In-class mean total cost per patient per drug (per 10% increase)                    |         | 1.01    |         | 1.01       |
| In-class mean patient copay before offset (per 10% increase)                        |         |         | 0.98*   | 0.97       |

\*  $p < 0.05$ , \*\*  $p < 0.01$ , \*\*\*  $p < 0.001$

Notes Model 1: Model without cost variables; Model 2: Model 1 with total cost variable; Model 3: Model 1 with copay variable; Model 4: full model with cost and copay variables

In quantile median regressions to assess whether the outliers drove the estimated association of coupon use explanatory variables, the association was similar across the distribution of coupon use frequency, but there was a greater magnitude of association among drugs with high coupon use frequencies (e.g., change in percentage point of claims with a coupon: 0.37, 2.33, 4.04 in 50<sup>th</sup>, 75<sup>th</sup>, 90<sup>th</sup> percentile) (**eTable 6**).

**eTable 6. Mean percentage point changes in the median of the proportion of transactions with coupons, quantile regression (n=2501)**

| Variables                                                                         | 50th percentile                                                    |                |         | 75th percentile                                                    |                |         | 90th percentile                                                    |                |         |
|-----------------------------------------------------------------------------------|--------------------------------------------------------------------|----------------|---------|--------------------------------------------------------------------|----------------|---------|--------------------------------------------------------------------|----------------|---------|
|                                                                                   | Change in Percent of Transactions with a Coupon (percentage point) | Standard Error | p-value | Change in Percent of Transactions with a Coupon (percentage point) | Standard Error | p-value | Change in Percent of Transactions with a Coupon (percentage point) | Standard Error | p-value |
| <i>Patient-Cost Characteristics</i>                                               |                                                                    |                |         |                                                                    |                |         |                                                                    |                |         |
| Mean total cost per patient per drug (per 1% increase)                            | 0.37                                                               | 0.13           | 0.005   | 2.33                                                               | 0.68           | 0.001   | 4.04                                                               | 0.96           | 0.000   |
| Mean patient copay before offset (per 1% increase)                                | -0.04                                                              | 0.13           | 0.768   | -1.04                                                              | 0.84           | 0.214   | -2.51                                                              | 1.79           | 0.162   |
| <i>Drug Characteristics</i>                                                       |                                                                    |                |         |                                                                    |                |         |                                                                    |                |         |
| Me-too single-source drugs                                                        | 0.93                                                               | 0.36           | 0.009   | 3.85                                                               | 1.49           | 0.010   | 4.78                                                               | 2.08           | 0.021   |
| <i>Drug-class Characteristics</i>                                                 |                                                                    |                |         |                                                                    |                |         |                                                                    |                |         |
| 5 percent point increase in mean prevalence of coupons among in-class competitors | 0.17                                                               | 0.08           | 0.037   | 1.55                                                               | 0.50           | 0.002   | 3.30                                                               | 0.58           | 0.000   |
| Drugs that were more expensive relative to the in-class mean                      | 1.35                                                               | 0.55           | 0.014   | 3.33                                                               | 1.98           | 0.093   | 4.23                                                               | 2.33           | 0.070   |
| Drugs that had higher mean patient copay relative to the in-class mean            | 0.79                                                               | 0.32           | 0.014   | 3.31                                                               | 1.59           | 0.037   | 7.09                                                               | 2.71           | 0.009   |
| Drugs that were more expensive relative to the in-class mean                      | -0.62                                                              | 0.30           | 0.038   | -1.23                                                              | 1.42           | 0.385   | -1.99                                                              | 2.85           | 0.487   |

Source: Author's analysis of data for October 2017- September 2019 from IQVIA Formulary Impact Analyzer.

NOTES: Quantile regression results using median, 75<sup>th</sup> percentile, and 90<sup>th</sup> percentile of the coupon use frequency as dependent variable. Coefficients represent changes in percentage point.

**eTable7. Drug classes with high frequency of coupon use**

| Therapeutic area      | Drug Class                           | Number of products with high coupon use | Number of manufacturers | Mean proportion of transactions with offsets per drug | Mean years on the market |
|-----------------------|--------------------------------------|-----------------------------------------|-------------------------|-------------------------------------------------------|--------------------------|
| Anti-infectives       | Tetracyclines                        | 5                                       | 4                       | 61.9                                                  | 11.3                     |
| Non-HIV Antivirals    | Viral hepatitis products             | 9                                       | 4                       | 53.6                                                  | 6.5                      |
| Vascular agents       | Angiotensin II antagonists           | 5                                       | 4                       | 51.3                                                  | 11.9                     |
| Diabetes, non-insulin | SGLT-2 Inhibitors                    | 9                                       | 3                       | 47.3                                                  | 5.4                      |
| HIV antivirals        | HIV- reverse transcriptase inhibitor | 5                                       | 3                       | 44.4                                                  | 15.8                     |
| HIV antivirals        | HIV antiviral combinations           | 12                                      | 6                       | 43.7                                                  | 6.6                      |
| Diabetes, non-insulin | DPP-4 inhibitors                     | 7                                       | 3                       | 42.1                                                  | 7.7                      |

\*Drug class with more than 5 products with high frequency of coupon use
